# Supplementary material for: Calycosin ameliorates osteoarthritis by regulating the imbalance between chondrocyte synthesis and catabolism
Source: Springer Nature journal article supplement (doi:10.1186/s12906-023-04314-z), 2024-01-22
Supplement: MOESM1 [file 26650194]

## Appendix A

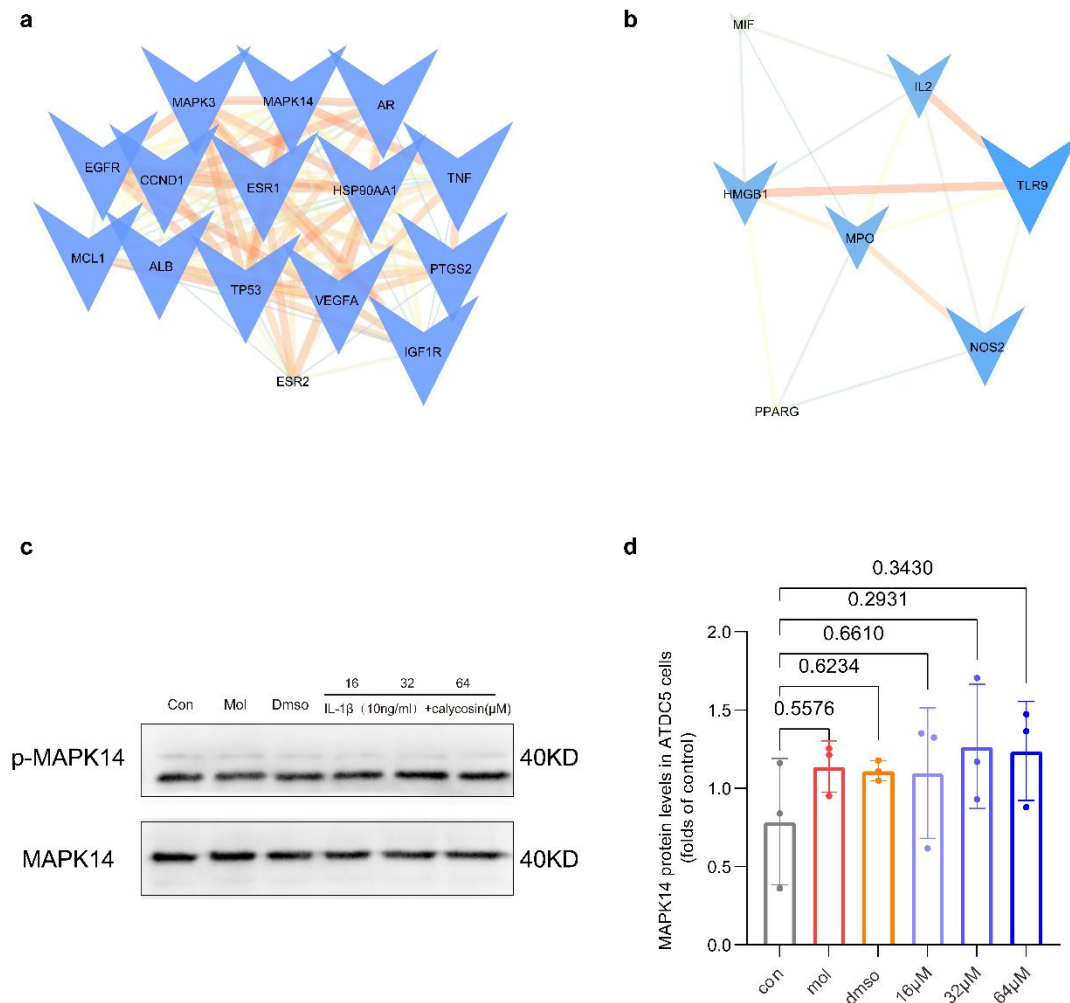

**Figure A1.** (a-b) Cluster analysis of the intersection targets show 2 core clustering graphs from PPI network. (c-d) Representative western blot bands and quantification analysis of the p-MAPK14.

## Appendix B

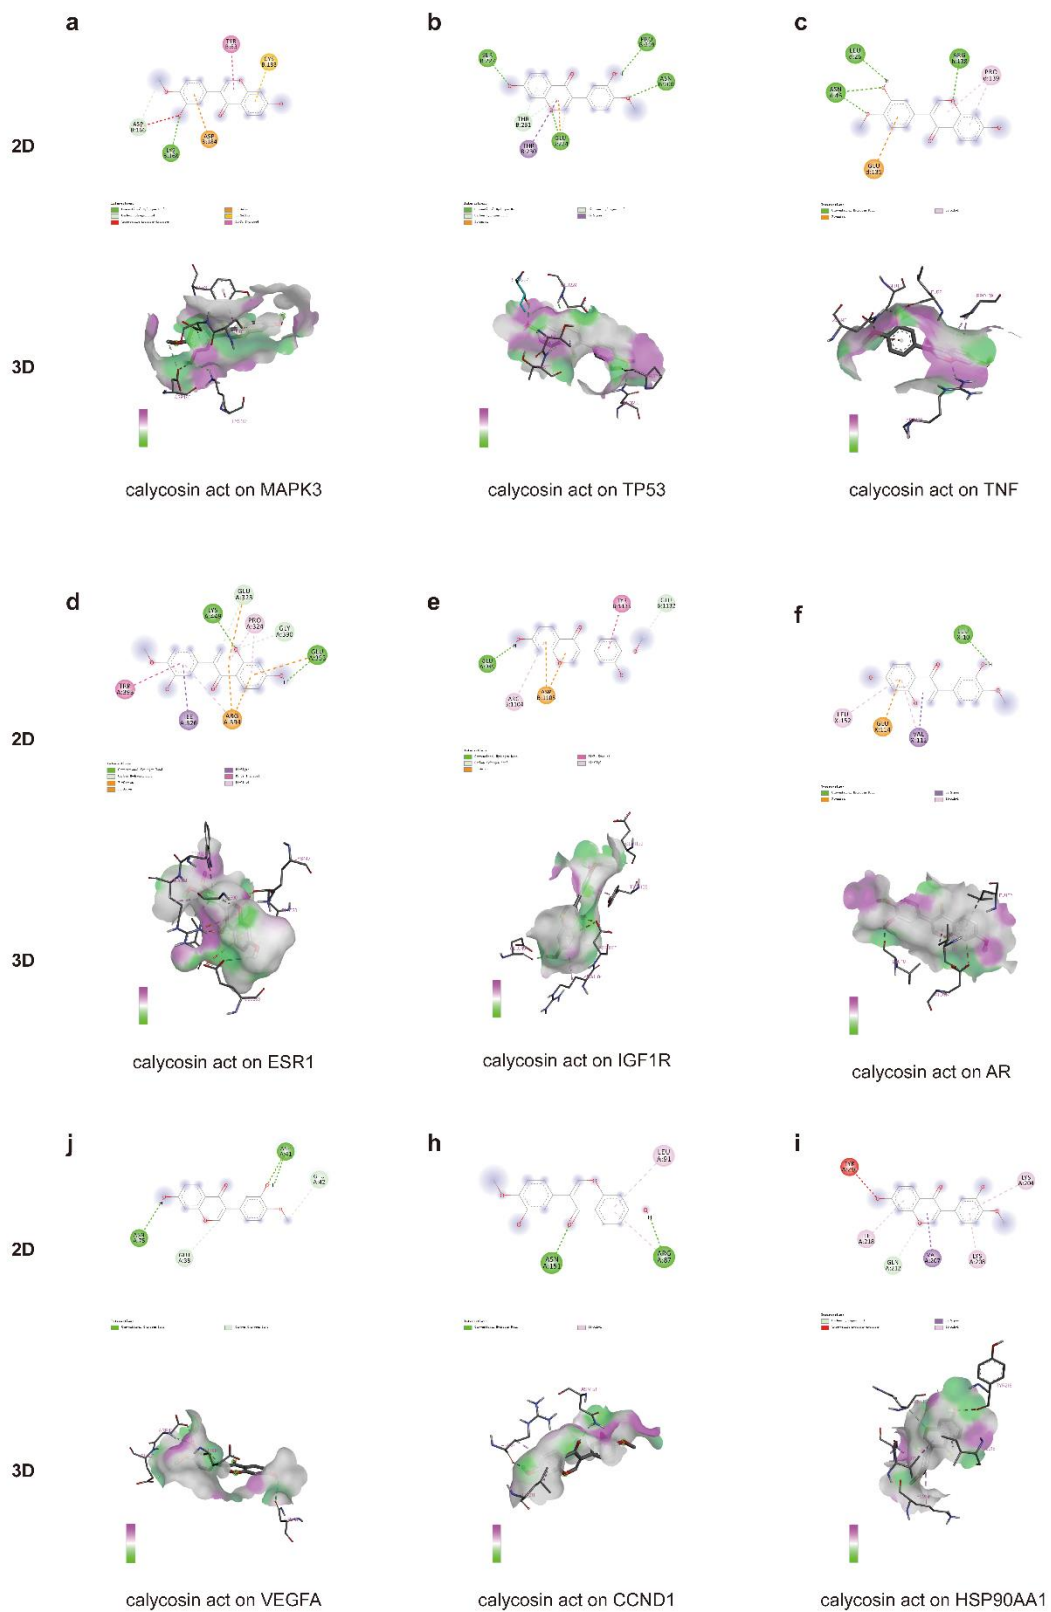

**Figure A2.** Molecular docking results of calycosin and hub genes. (a) MAPK3 (b) TP53 (c) TNF (d) ESR1 (e) IGF1R (f) AR (j) VEGFA (h) CCND1 (i) HSP90AA1

## Appendix C

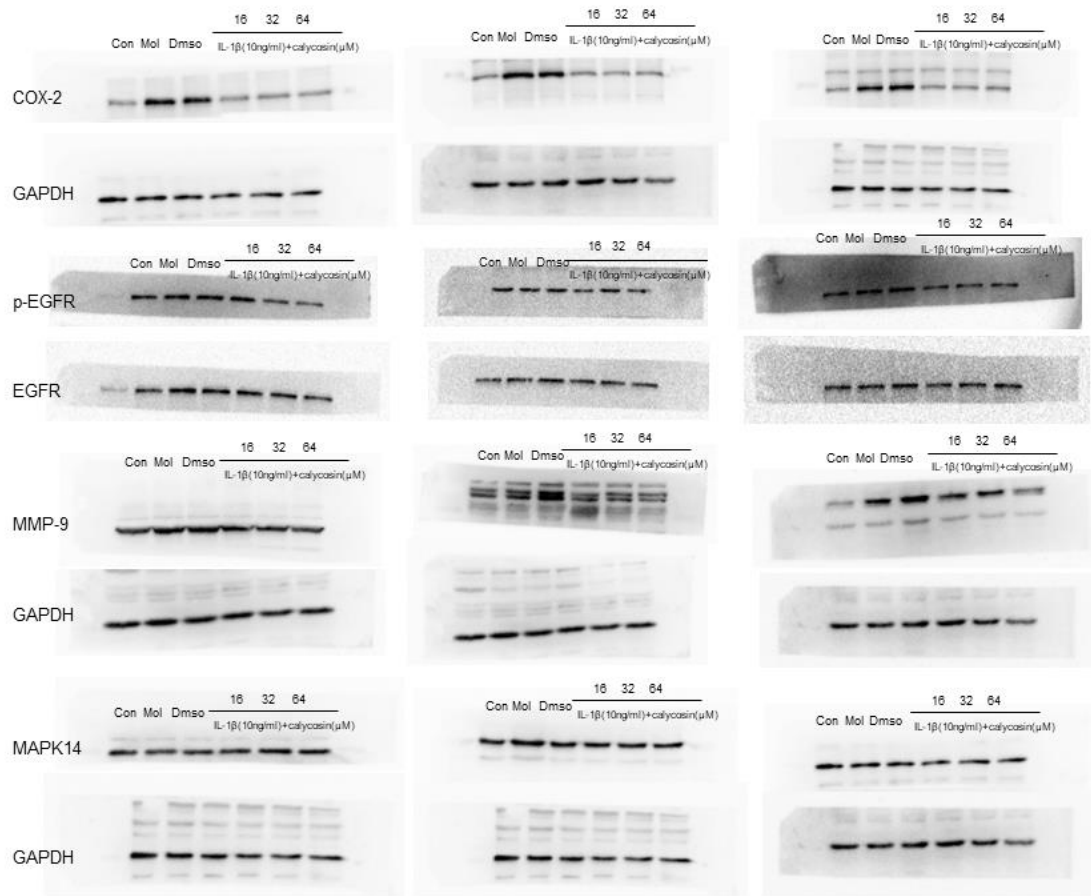

**Figure A3.** Western Blotting.
